**Modulation of temporal dynamics of gene transcription by activator potency in the  
*Drosophila* embryo**

Junbo Liu<sup>1</sup> and Jun Ma<sup>1,2,\*</sup>

<sup>1</sup> Division of Biomedical Informatics

<sup>2</sup> Division of Developmental Biology

Cincinnati Children's Research Foundation

3333 Burnet Avenue

Cincinnati, Ohio

United States of America

\* Corresponding author: Divisions of Biomedical Informatics and Developmental Biology, Cincinnati Children's Hospital Research Foundation, 3333 Burnet Avenue, Cincinnati, OH 45229, USA; 513-636-7977 (phone); jun.ma@cchmc.org (email)

## Abstract

The *Drosophila* embryo at the mid-blastula transition (MBT) experiences a concurrent receding of a first wave of zygotic transcription and surge of a massive second wave. It is not well understood how genes in the first wave become turned off transcriptionally and how their precise timing may impact embryonic development. Here we perturb the timing of the shutdown of Bicoid (Bcd)-dependent *hunchback* (*hb*) transcription in the embryo through the use of a Bcd mutant that has a heightened activating potency. A delayed shutdown increases specifically Bcd-activated *hb* levels that alter spatial characteristics of the patterning outcome and cause developmental defects. Our study thus documents a specific participation of the maternal activator input strength in timing molecular events in precise accordance with the MBT morphological progression.

## Introduction

Transfer of developmental control from maternally-deposited products to zygotically-expressed products is a process in animal development that all embryos must experience (Tadros and Lipshitz, 2009). In *Drosophila*, a set of cellular events, such as cell cycle lengthening and cellularization, marks a specific stage within this period and is referred to as the mid-blastula transition (MBT) (Tadros and Lipshitz, 2009; Langley et al., 2014; Gebelein and Ma, 2015). During this time there is a massive wave of zygotic gene activation (Pritchard and Schubiger, 1996; De Renzis et al., 2007), which coincides with the receding of an earlier wave of transcription of zygotic genes, such as *nullo*, *serendipity-alpha* (*sry-alpha*), *sex-lethal* (*sxl*) and *hunchback* (*hb*) (Rose and Wieschaus, 1992; ten Bosch et al., 2006; Erickson and Quintero, 2007; Liu and Ma, 2013b). The mitotic phase is known to be disruptive to transcription prior to nuclear cycle (nc) 14 (Shermoen and O'Farrell, 1991). But during nc14, transcription of these early-expressing genes becomes turned off well before the mitotic phase (Rose and Wieschaus, 1992; Erickson and Quintero, 2007; Liu and Ma, 2013b). It remains poorly understood how this is controlled. Since maternally-derived products become degraded while zygotic products accumulated during this time (Bushati et al., 2008; Lu et al., 2009; Lee et al., 2014), we can envision two simplest mechanisms. It is possible that the observed transcription shutdown is reflective of a mere loss (decay) of maternally-derived transcriptional activators or, alternatively, repression by zygotically derived transcriptional repressors that have accumulated to sufficient levels.

Here we investigate these possibilities through the use of *hb*, a gap gene that is required for the formation of head and thoracic structures (Lehmann and Nusslein-Volhard, 1987). An

important feature of *hb* transcription prior to its shutdown is that the maternally-derived morphogenetic protein Bicoid (Bcd) acts as the primary input (He et al., 2008; Liu et al., 2011; Liu and Ma, 2011; Cheung et al., 2014; He et al., 2015). This feature contrasts with other early-expressing genes that are activated by sets of either complex or currently uncharacterized inputs (Salz and Erickson, 2010). We show that a reporter gene that is driven by synthetic Bcd binding sites also exhibits a characteristic shutdown phase of transcription at nc14, suggesting that properties intrinsic to Bcd as a transcriptional activator may be directly involved in the shutdown process. Through the use of a Bcd mutant lacking its primary sumoylation site (Liu and Ma, 2012), we show that the shutdown timing of Bcd-activated *hb* transcription at nc14 can be perturbed and such a perturbation can lead to both molecular and phenotypic consequences. Our results presented in this study do not support either of the two simple models envisioned above. They suggest that the shutdown of Bcd-activated transcription at nc14 is reflective of a general or global mechanism that involves specifically the maternal activator input strength. Our results also underscore the importance of the shutdown phase of transcription dynamics during the MBT in safeguarding patterning trajectories toward a normal outcome.

## Results

### Evaluating *hb* as a tool for monitoring transcription shutdown during the MBT

To identify genes that become shut down during nc14, we analyzed the RNA-seq dataset generated from *Drosophila* embryos that are separated into four temporal groups of nc14 (Lott et al., 2011). Our analysis identified 194 genes that exhibit characteristics of being shut down (Supplementary material Table S1; also see Supplementary material Fig. S1 for dynamic profiles of expression levels of selected candidate genes and those that do not exhibit shutdown

properties). The functions of these genes are highly enriched in such categories as “developmental proteins”, “embryonic morphogenesis”, and “cell fate commitment” (Supplementary material Table S2), suggesting that this group of genes plays diverse and important roles in the early embryo development. The Bcd target gene *hb* is on the list of Table S1, suggesting that mechanistic studies of *hb* as a representative of this class of genes has a general significance.

To determine whether the shutdown of *hb* transcription at nc14 is a property associated with the MBT, we took advantage of haploid embryos derived from homozygous *maternal haploid* (*mh<sup>1</sup>*) females (referred to as *mh* embryos) (Gans et al., 1975; Zalokar et al., 1975). The *mh* embryo undergoes an extra cleavage cycle, postponing the MBT to nc15 (Fig. 1A). We reasoned that, if shutdown of *hb* transcription is associated with the MBT, this event would be correspondingly postponed to nc15 in *mh* embryos, but if this event is associated with a specific time of development, it would take place at nc14 in *mh* embryos (Lu et al., 2009). Importantly, the shutdown of Bcd-activated *hb* transcription is a very quick event in wt embryos, taking place within a few minutes upon entering the nc14 interphase, and it does not become “reactivated” after this shutdown event (Liu and Ma, 2013b). Thus, according to the MBT hypothesis, *hb* is expected to be transcriptionally active at early but not late nc15 in *mh* embryos, and according to the developmental time hypothesis, *hb* is expected to be transcriptionally inactive even at early nc15 in *mh* embryos.

We monitored active *hb* transcription through the use of an intronic probe that detects exclusively the nascent transcripts as discrete fluorescence dots inside the nucleus, referred to as

intron dots (He et al., 2011; He et al., 2012; Liu and Ma, 2013b). This method is highly sensitive for evaluating the dynamic properties of active transcription because the detected signals are exclusively from nascent transcripts prior to the removal of intron mRNA by splicing (Bothma et al., 2011; Liu and Ma, 2013b). For the endogenous *hb*, the intron dots accurately record the transcriptional status of the Bcd-responsive P2 promoter of individual copies of the gene (He et al., 2011; He et al., 2012; Liu and Ma, 2013b). Fig. 1B-E show confocal images of two *mh* embryos at nc15. While the early embryo exhibits a robust active transcription as evidenced by the number of intron dots per nucleus ( $\rho$ ), the late embryo has a deficit in  $\rho$  (Fig. 1F,G). These results support the hypothesis that *hb* shutdown is a property associated with the MBT.

**A *lacZ* reporter gene driven by Bcd binding sites and without *hb* cis-regulatory elements is sufficient to become shut off in embryos at nc14**

It is well documented that sequence-specific transcriptional repressors play important roles in regulating the spatial and temporal behavior of gene transcription (Jaeger et al., 2004; Jaeger et al., 2012). The shutdown of *hb* transcription at nc14 could thus reflect the accumulation and action of such repressors (Little et al., 2013); nc14 is a time during which regulatory mechanisms among gap gene products begin to intensify (Surkova et al., 2008; Manu et al., 2009). To evaluate this possible mechanism of shutdown for Bcd-activated transcription, we generated a transgenic fly line with a *lacZ* reporter gene. This reporter gene, *bcd6-lacZ*, contains six synthetic Bcd binding sites upstream of a different core promoter (*hsp70*) other than the P2 promoter used in Bcd-dependent *hb* transcription. Bcd is known to be capable of recognizing multiple binding DNA sites in a highly cooperative manner (Ma et al., 1996; Burz et al., 1998).

We performed quantitative fluorescence *in situ* hybridization (FISH) to quantify the product of this reporter gene in embryos that are grouped into temporal classes of ~4 min intervals. Fig. 2A shows the mean profiles of FISH intensities detecting *lacZ* mRNA at the indicated time classes (Supplementary material Fig. S2A-F for individual profiles). The intensities extracted from the peak region in individual embryos ( $lacZ_{\text{peak}}$ ) are shown in Fig. 2B. Upon reaching its highest level at T3,  $lacZ_{\text{peak}}$  as a group mean begins to descend as a function of time. This decrease, while less severe than that of *hb* mRNA (Liu and Ma, 2013b) and consistent with a longer lifetime of *lacZ* mRNA (Monsma et al., 1988), is supportive of the possibility that, similar to the endogenous *hb* gene, the *bcd6-lacZ* reporter also becomes turned off as embryos progress into nc14.

To test this possibility directly, we analyzed the temporal profile of the active sites of reporter gene transcription detected as discrete fluorescence dots inside the nucleus (Supplementary material Fig. S2G,H). Fig. 2C shows a plot of the mean of detected dot number per nucleus  $\rho$  as a function of relative AP position  $x/L$  at different time classes (Supplementary material Fig. S2J-M for individual profiles). The  $\rho$  profiles exhibit an overall resemblance to those of the *lacZ* mRNA FISH intensities (Fig. 2A), supportive of the suggestion that the probability of active transcription of gene copies at a location in the embryo is directly related to the levels of mature transcripts (He et al., 2011; He et al., 2012). An important aspect of these profiles particularly relevant to our current study is that they show a decrease in  $\rho$  as a function of time, illustrating a reduction in the probability of active transcription of this reporter gene during nc14. Specifically, the mean dot number per nucleus at the peak region ( $\rho_{lacZ}$ ) peaks at

T1 and progressively decreases as a function of time (Fig. 2D). This kinetic profile of reporter gene shutdown is broadly comparable to that of the endogenous *hb* gene (Liu and Ma, 2013b). Since our *bcd6-lacZ* reporter gene is transcribed from a different core promoter and driven by synthetic Bcd binding sites, our results show that *cis*-regulatory elements that are specific to *hb* are not required to mediate the shutdown of Bcd-activated transcription at nc14 (see Discussion for additional information).

### **A Bcd mutant that has an elevated activating potency forms a normal gradient in the embryo**

Our *bcd6-lacZ* results suggest that the shutdown of Bcd-dependent *hb* transcription at nc14 may be reflective of the molecular properties of Bcd during this time. To test this possibility directly (see below), we took advantage of a Bcd mutant, Bcd<sup>K308A</sup>, which has an elevated ability to activate transcription in *Drosophila* cells (Liu and Ma, 2012). We generated transgenic flies with an ~18 kb genomic fragments containing the *bcd* coding sequences for either wt Bcd or Bcd<sup>K308A</sup> (referred to as *bcd*<sup>wt</sup> and *bcd*<sup>K308A</sup> transgenes, respectively). To ensure an identical genomic location of the two transgenes for our quantitative studies, we employed the ΦC31-mediated transgenesis approach and inserted them at a landing site on the second chromosome. We used embryos from *bcd*<sup>E1</sup> mothers with a copy of either *bcd*<sup>wt</sup> or *bcd*<sup>K308A</sup> transgene for technical convenience, referred to as the wt and mutant embryos, respectively. It has been documented that *bcd* gene copy number affects only where *hb* is expressed in the embryo (i.e., its boundary position) without affecting how much it is expressed (i.e., its amplitude) (Liu and Ma, 2013a). In addition, the *hb* expression amplitude is insensitive to



whether Bcd is derived from an endogenous *bcd* locus or a transgenic copy (Supplementary material Fig. S3A-E).

As further detailed below, despite an increased amplitude of *hb* expression in mutant embryos, the *hb* expression boundary does not exhibit a posterior shift, suggesting that mutating the primary sumoylation site of Bcd impacts its transcription activation function as opposed to the formation of a normal gradient. To directly evaluate the mutant Bcd gradient profile, we performed anti-Bcd immunostaining in embryos. Fig. 3A shows that the mean intensity profiles from wt and mutant embryos exhibit an overall similarity (see Supplementary material Fig. S3F,G for individual profiles). To compare the Bcd gradient profiles quantitatively, we measured their length constants ( $\lambda$ ) and amplitudes (using the maximal Bcd intensities,  $B_{\max}$ , as proxies). Fig. 3B shows that Bcd gradient profiles from the wt and mutant embryos have a similar  $\lambda$  ( $81.42 \pm 14.87 \mu\text{m}$  ( $n = 16$ ) and  $82.87 \pm 18.87 \mu\text{m}$  ( $n = 18$ ), respectively;  $p = 0.81$ ). In addition, they have a similar  $B_{\max}$  ( $14.01 \pm 4.42$  ( $n = 16$ ) and  $14.34 \pm 4.17$  ( $n = 18$ ), respectively;  $p = 0.82$ ; Fig. 3C). These results document quantitatively that the sumoylation-defective Bcd mutant forms a normal concentration gradient (Grimm and Wieschaus, 2010), suggesting that its elevated activating function in the embryo is not associated with an altered Bcd protein stability.

### **The duration time of active *hb* transcription is elongated in the mutant embryo**

To evaluate specifically the relationship between the activating potency of Bcd and the timing of *hb* shutdown at nc14, we performed *hb* intron staining in embryos. To permit close evaluations of the temporal dynamics of *hb* transcription that takes place rapidly at nc14, we grouped embryos into time classes (referred to as t1, t2, t3, ...) that have a mean time interval of

~1 min ((Liu and Ma, 2013a); see also Fig. 4 legend for additional information about time scale and other technical details). Fig. 4A,B show the profiles of the mean intron dot number per nucleus ( $\rho$ ) as function of  $x/L$  at different time classes of wt and mutant embryos (see Supplementary material Fig. S4 for individual profiles).

Fig. 4C shows the mean intron dot numbers at the plateau region ( $\rho_{\text{plat}}$ ) for wt and mutant embryos at the indicated time classes with standard deviation (s.d.) shown. Consistent with the temporal dynamics of active *hb* transcription under the control of the endogenous Bcd protein (Liu and Ma, 2013b),  $\rho_{\text{plat}}$  in our transgenic wt embryos (Fig. 3C; in blue) also exhibits a rapid ascent upon entering the nc14 interphase to reach its peak at t3. This is followed by a quick descent, which represents the shutdown phase of the active *hb* transcription at nc14. Similar to the wt embryos,  $\rho_{\text{plat}}$  in mutant embryos (Fig. 4C; in pink) exhibits a similar rapid ascent, also reaching the peak at t3 and attaining a similar peak level ( $1.01 \pm 0.18$  and  $1.02 \pm 0.15$  in wt and mutant embryos, respectively;  $p = 0.96$ ). However, in contrast to an immediate descent in wt embryos,  $\rho_{\text{plat}}$  in mutant embryos stays at its peak level until t4, from which time the quick descent begins. These results show evidence for an elongated duration time of active *hb* transcription in the mutant embryo, resulting from a postponement of the shutdown phase, as opposed to an accelerated onset phase (see also Supplementary material Fig. S5 for data generated from independent transgenic lines).

## **A delayed shutdown phase of active *hb* transcription at *nc14* leads to an increased level of *hb* mRNA**

To investigate how an elongated duration of active transcription affects *hb* gene product accumulation, we performed quantitative FISH detecting mature *hb* mRNA in embryos. Fig. 5A shows the mean *hb* intensity profiles as a function of  $x/L$ , revealing a higher transcript level at the anterior domain in the mutant embryo (see Supplementary material Fig. S6A,B for individual profiles). The mean intensities at the plateau region ( $hb_{\text{plat}}$ ) for wt embryos were significantly lower than those in mutant embryos (Fig. 5B;  $7.39 \pm 3.03$  ( $n = 16$ ),  $10.89 \pm 4.35$  ( $n = 17$ ), respectively,  $p = 0.012$ ). Importantly, the peak level of *hb* intensity of the Bcd-independent posterior stripe (Fig. 5C; referred to as  $hb_{\text{post}}$ ) is similar between wt and mutant embryos ( $p = 0.79$ ). In addition, the expression level of another gap gene, *Kruppel* (*Kr*), which is regulated primarily by cross-regulatory mechanisms (Jaeger et al., 2012) also remains similar in wt and mutant embryos (Supplementary material Fig. S6C-F). Together, these results document a specific increase of the amplitude of Bcd-activated *hb* expression in mutant embryos (see also see Supplementary material Fig. S6G-K for *hb* amplitude increase detected in independent transgenic lines).

## **The Bcd mutant alters the spatial characteristics of AP patterning and causes developmental defects**

To determine whether an elevated amplitude of *hb* expression caused by a stronger activating potency of Bcd can be propagated downstream of the AP patterning network, we measured *even-skipped* (*eve*) expression profiles in embryos. Fig. 6A shows that the mean normalized intensity profiles from the wt and mutant embryos have different spatial

characteristics (see Supplementary material Fig. S7A,B for individual profiles). Here we focused specifically on the distance between the anterior boundaries of the *eve* stripes 3 and 4 (referred to as  $\Delta EL_{eve3-4}$ ), a spatial feature known to be directly sensitive to the *hb* gene dose (Payankaulam and Arnosti, 2008; Yu and Small, 2008). We found that  $\Delta EL_{eve3-4} = 10.34 \pm 1.59$  and  $9.07 \pm 1.01$  (% EL; mean  $\pm$  s.d.) in wt and mutant embryos, respectively (Fig. 6B;  $n = 9$  and 8, respectively,  $p = 0.012$ ). They document that the impact of an increased activating strength of Bcd on *hb* expression can be propagated downstream of the AP patterning network.

The altered transcription patterns in mutant embryos can lead to developmental defects. First, we compared the hatching rates of the embryos from mothers containing different copies of the transgenes at different temperatures. Our results (Fig. 6C) show a hatching rate reduction between embryos from *bcd<sup>E1</sup>* mothers with two copies of *bcd<sup>wt</sup>* and *bcd<sup>K308A</sup>* transgenes (referred to as *bcd<sup>wt</sup>;bcd<sup>E1</sup>* and *bcd<sup>K308A</sup>;bcd<sup>E1</sup>* embryos, respectively) at 29°C but not at 25°C. Embryos from *bcd<sup>E1</sup>* mothers with only one copy of the wt or mutant transgenes did not exhibit a difference in hatching rate. These results suggest a hatching rate reduction caused by the Bcd mutant in a gene dosage- and temperature-dependent manner. In addition, we examined the cuticle patterns of the *bcd<sup>wt</sup>;bcd<sup>E1</sup>* and *bcd<sup>K308A</sup>;bcd<sup>E1</sup>* embryos at a temperature (29°C) that caused a hatching rate difference. We detected mutant embryos that exhibited head structure defects (Fig. 6D,E) including a shortening in median tooth (mt) and epistomal sclerite (es). Among the morphologically defective embryos, a fusion between denticle bands could also be observed (Fig. 6F,G).

### The impact of enhanced activating potency of Bcd is highly specific

As shown above, an altered shutdown phase, but not onset, of *hb* transcription at nc14 in embryos containing the sumoylation-defective Bcd mutant documents a temporal specificity of the effect caused by this mutant protein. It argues against a model in which this mutant protein leads to a temporally non-specific increase of *hb* transcription probability during nc14. To further evaluate the temporal specificity of the effect of the Bcd mutant on the time scale of nuclear cycles we analyzed intron staining images of embryos at nc13. Fig. 7A shows the mean  $\rho$  profiles in wt and mutant embryos (see Supplementary material Fig. S7C,D for individual profiles). Importantly, the wt and mutant embryos have similar intron dot numbers in the plateau region,  $\rho_{\text{plat}} = 1.36 \pm 0.23$  ( $n = 3$ ) and  $1.38 \pm 0.08$  ( $n = 3$ ), respectively (Fig. 7B;  $p = 0.92$ ). These results further argue against a temporally non-specific increase of *hb* transcription probability caused by this mutant protein. Furthermore, unlike nc14, the amplitude of *hb* expression at nc13 is unaffected by the sumoylation mutation (Supplementary material Fig. S7E-H; see also Supplementary material Fig. S7I-L for data from two independent transgenic lines).

To further evaluate the specificity of the effect of the Bcd mutation, we analyzed active *hb* transcription at a location (PS4) known to be independent of Bcd as a direct input (Perry et al., 2012; Chen et al., 2013). The intron dot number at the PS4 location ( $\rho_{\text{PS4}}$ ) exhibits similar profiles in wt and mutant embryos at nc14 (Fig. 7C; see also Supplementary material Fig. 5P for data from two independent transgenic flies). They document that, in contrast to a delayed shutdown of Bcd-dependent *hb* transcription, temporal behavior of active *hb* transcription at the PS4 location is unaffected.

## Discussion

A fundamental feature of animal development is the control of gene expression to achieve specific spatial and temporal patterns in a highly coordinated way (Gebelein and Ma, 2015). There are two aspects of the temporal dynamics of a gene's transcription in a developmental system, its onset and duration (Garcia et al., 2013; Liu and Ma, 2013b; Lucas et al., 2013). Proper control of the temporal dynamics of transcription is particularly important for developmental systems that progress rapidly, such as the early *Drosophila* embryo (Foe and Alberts, 1983; Guilgur et al., 2014). It is well known that alterations in transcription activation of early zygotic genes can cause morphological defects in the *Drosophila* embryo (Bushati et al., 2008; Liang et al., 2008; Lagha et al., 2013; Sung et al., 2013). Our results show that the timing of *hb* transcription shutdown is associated with the MBT and can be perturbed specifically in embryos containing a Bcd mutant defective in sumoylation (Fig. 4). A postponement of *hb* shutdown at nc14 can elongate the duration of active transcription, leading to increased levels of *hb* gene products and patterning defects (Fig. 6). These results show that the precise timing in the shutdown phase of Bcd-activated *hb* transcription at nc14 is important for normal development. The effects of the Bcd sumoylation mutant on *hb* shutdown are highly specific, and they are restricted to the shutdown phase (without affecting the onset phase) only at nc14 and only on Bcd-activated *hb* transcription (Fig. 7). It should be noted that our current results do not show that Bcd sumoylation is a temporally regulated event during the MBT, although it represents an attractive possibility that remains to be tested in the future. Temporally regulated Bcd sumoylation could directly account for the temporally restricted effects of the Bcd mutant, but "constitutive" Bcd sumoylation can also exert time-dependent actions in association with the global events of the system (e.g., mitotic cycles and morphological progression of the MZT).

Our results provide new insights into how Bcd-activated *hb* transcription becomes shut down at nc14. Our evaluations of the *bcd6-lacZ* reporter gene demonstrate that neither the P2 promoter of *hb* nor any of its *cis*-regulatory elements is required for the shutdown of Bcd-activated transcription at nc14. Importantly, *hb* shutdown takes place at a time when the Bcd concentration gradient remains intact (Liu and Ma, 2013b). It has been suggested that specific pathways can become activated at the MBT to cause a quick degradation of maternal proteins such as Twine (Di Talia et al., 2013). If *hb* shutdown were to merely reflect a decaying Bcd gradient at nc14, we would have expected a shutdown process that initiates near mid-embryo (where Bcd concentration is low) and “spread” toward the anterior (with increasing Bcd concentrations). But our results do not support this prediction (Supplementary material Fig. S8A,B; see also (Liu and Ma, 2013a)). In addition, neither the length constant nor the amplitude of the Bcd gradient profile is affected by the Bcd mutation (Fig. 3). Thus our results show that the timing of Bcd-activated transcription during nc14 does not require either a physical disappearance of this maternal activator or the accumulating activities of sequence-specific zygotic repressors. Instead it is the functional potency of the maternal activator Bcd that is a part of the mechanism in timing the molecular events in accordance with the MZT morphological progression. Importantly, the potency of Bcd activator can be either strengthened (this paper) or weakened (Liu and Ma, 2013a) to tune--in opposite directions--the *hb* shutdown timing and *hb* expression level. We note that our *bcd6-lacZ* reporter results do not formally exclude the possibility that the shutdown of Bcd-activated transcription at nc14 involves a zygotic repressor(s) that operates by competing with Bcd binding to its DNA sites. But we currently do not favor this possibility because the position-independent and quick features of the shutdown

event would likely require an unknown zygotic repressor(s) not only to have the same/overlapping Bcd binding specificity but also to accumulate in a spatially non-restricted (i.e., covering the entire *hb* expression domain) and temporally sudden way at nc14.

As part of the receding of the first wave of zygotic transcription in association with the MBT (Rose and Wieschaus, 1992; Erickson and Quintero, 2007), *hb* is among a group of genes that exhibit a shutdown phase at nc14. These genes play key roles in different processes that are ongoing during the MBT, suggesting a possibility that a global or general mechanism may regulate the shutdown events of transcription in a coordinated manner. Our study shows that the timing of the shutdown can be postponed by an elevated activating potency of Bcd, but only to a degree. For genes that are activated by combinatorial sets of maternal inputs, it remains to be determined whether it is also the activators' functions, as opposed to protein availability, that are regulated during transcription shutdown at the MBT. Genes that are transcriptionally active prior to the MBT tend to share promoter features that are distinct from those of the genes that become activated during the MBT (Chen et al., 2013). An intriguing possibility exists where the MBT might be associated with a systematic change in the composition of the transcription machinery (Phillips and Pitt, 1985). But the fact that a synthetic reporter containing a different core promoter also exhibits a shutdown phase at nc14 indicates that the *hb* P2 promoter is not required.

A recent study reveals an interplay between zygotic transcription and DNA replication at the MBT (Blythe and Wieschaus, 2015). It has been proposed that euchromatin DNA is replicated within a few minutes into the nc14 interphase (Shermoen et al., 2010). Thus the DNA replication time coincides broadly with the time of *hb* shutdown, raising a question of whether



DNA replication at the *hb* locus might trigger its transcription shutdown. Supplementary material Fig. S8C,D show an embryo that we were able to capture in which nuclei contain more than two intron dots. The existence of nuclei with more than two dots is a positive indicator of DNA replication at the *hb* gene locus. The strong intron staining detectable at the anterior part of the embryo indicates that Bcd-activated *hb* transcription has not yet been turned off (nuclear height measurements suggest that this embryo belongs to time class t2). These results thus suggest that DNA replication at the *hb* locus does not directly trigger its transcription shutdown at nc14.

Sumoylation is a posttranslational modification that regulates a variety of biological processes through mechanisms that may involve protein-protein interactions, subcellular localization, and protein stability (Gareau and Lima, 2010). From the perspective of developmental biology, many transcriptional activators with important developmental roles are substrates of sumoylation (Geiss-Friedlander and Melchior, 2007; Nie et al., 2009). It has been reported that sumoylation of Medea (Med), an intracellular transducer of *Drosophila* morphogen Decapentaplegic (Dpp), triggers Med nuclear export and therefore, restricts the range of the Dpp signaling (Miles et al., 2008). The lengthening of the duration of Bcd-activated *hb* transcription caused by the Bcd sumoylation mutation increases the amplitude of *hb* expression without extending its expression boundary. Thus, sumoylation of proteins involved in morphogen functions can alter either the action range (in space) or the output level (due to action time). In yeast, sumoylation has been suggested to play a role in terminating inducible activation events by evicting activator molecules from promoters. For example, disruption of Gcn4 sumoylation can extend its promoter association and increase the expression level of the target gene *ARG1*

(Rosonina et al., 2010). Whether sumoylation of Bcd plays a mechanistically equivalent role in evicting Bcd molecules from the *hb* enhancer at nc14 remains an open question and speculative possibility.

## **Materials and Methods**

### **Identification of transcription shutdown genes at nc14**

We used a published RNA-seq dataset (Lott et al., 2011) to identify genes that become shut down during nc14. This dataset consists of normalized read counts (RPKM) per gene for individual embryos that have been temporally ranked and grouped into four time classes in the nc14 interphase (referred to as 14A, 14B, 14C and 14D from young to old). We performed two analyses aimed at systematically identifying genes that exhibit characteristics of transcription shutdown at nc14. First, we selected transcripts that could be positively identified as zygotic products expressed from paternal gene copies (marked with single-nucleotide polymorphisms (SNPs)) (Lott et al., 2011). Among those transcripts that have a RPKM value of  $>2$ , we calculated the RPKM ratios between two adjacent time classes, 14A to 14B, 14B to 14C, or 14C to 14D. We defined a gene to possess a shutdown property during nc14 if any of these three ratios is greater than 1.5. This first analysis led to the identification of 156 shutdown genes from a total of 3,401 genes analyzed. Second, based on the list of genes that were categorized as zygotic genes (Lott et al., 2011), we selected 1,658 genes that do not overlap with the 3,401 genes used in the first analysis. This second analysis led to the identification of an additional 38 shutdown genes using the same criteria defined above. The two gene lists combined gave a total of 194 shutdown genes, which are shown in Supplementary material Table S1. The Database for Annotation, Visualization and Integrated Discovery (DAVID) was then used for the assessment of functional enrichment in the identified shutdown genes.

## Plasmid construction and *Drosophila* transgenesis

Two tandem oligonucleotides (5'-GGCGC *GTCGAC* AGGTTC **TAATCC** CGGTC **TAATCC** CTCGAGTC **TAATCC** CATGAG TCGACG *GTCGAC* CCCC-3') were cloned into the Sal I site of pCZ3005 plasmid (Zhao et al., 2002) to yield the plasmid ljb3058. The DNA fragment containing six Bcd binding sites (TAATCC) was amplified from ljb3058 and cloned into the Xba I site of the vector placZattB (Bischof et al., 2007) to yield the *bcd6-lacZ* reporter plasmid ljb5003. Using a commercial service (Rainbow Transgenic Flies Inc.), ljb5003 was inserted into the docking site VK00037 of fly line 24872 through  $\phi$ C31-integrase mediated transformation to generate the *bcd6-lacZ* transgenic flies.

An ~6.3kb *Drosophila* genomic DNA (located between BamH I and EcoR I sites), which contains the Bcd coding sequence and the flanking sequences, was cloned into the pCaSpeR4 vector. The resultant plasmids contained either the wt Bcd or BcdK<sup>308A</sup> coding sequences and were named ljb4056 and ljb4057, respectively. The *bcd*<sup>K308A</sup> mutation in ljb4057 was generated by a PCR-based standard site-directed mutagenesis. The ljb4057 was used to introduce the *bcd*<sup>k308A</sup> mutation into the CH322-100D18 plasmid with the recombineering-mediated gap repair method (Venken et al., 2006) to obtain the plasmid ljb5006. An identical, parallel cloning experiment was carried out for the ljb4056 to obtain the plasmid ljb5005; thus the two plasmids ljb5005 and ljb5006 differ only by the *bcd*<sup>k308A</sup> mutation. The CH322-100D18 plasmid was purchased from BACPAC Resources Center (BPRC) at Children's Hospital Oakland Research Institute (CHORI). It is a bacteria artificial chromosome (BAC) vector containing ~18.5kb *bcd* genomic DNA and the bacterial attachment (*attB*) site for site-specific integration. The resultant

ljb5005 and ljb5006 were then inserted into the same docking site VK00001 of fly line 24861 through  $\phi$ C31-integrase mediated transformation to generate the transgenic flies using the commercial service. The ljb5056 and ljb4057 were also used to generate the transgenic flies through standard *P*-element mediated transformation with the commercial service. The fly line 7130 with the *mh<sup>1</sup>* mutation was obtained from Blooming Stock Center.

### **Embryo staining, imaging and data analysis**

All embryos (0-4 hrs) used in quantitative fluorescence *in situ* hybridization (FISH) and immunostaining were collected at 25°C. Quantitative FISH to detect *lacZ*, *hunchback* (*hb*) or *even-skipped* (*eve*) mRNA in embryos, imaging and data analysis were performed as follows (He et al., 2008; Liu and Ma, 2011; Liu and Ma, 2013a). Briefly, quantitative FISH were performed on a side-by-side basis wherever the data were used for direct comparisons and all images were captured within a linear range under identical settings during a single imaging cycle. All images focused on the midsagittal plane and, for each embryo, included one that captured the nuclei stained with 4'-6-Diamidino-2-phenylindole (DAPI). Nuclear cycle was determined by the number of nuclei on the dorsal side of the midsagittal image; typically, embryos at nc13 have ~55-65 identifiable nuclei that are round in shape. Embryos at nc14 have ~70-80 identifiable nuclei, which are round in shape initially and become progressively elongated (along the apical-basal axis) as a function of developmental time (Liu and Ma, 2013b). In order to monitor the temporal dynamics of *bcd6-lacZ* transcription, embryos at nc14 were grouped into time classes (referred to as T1, T2, T3...) based on the estimated nuclear height. The interval between the time classes is ~4 minutes according to an established conversion (Fung et al., 1998). To extract data along anterior-posterior (AP) axis, each embryo was divided into 50 bins (He et al., 2008).

The  $lacZ_{\text{peak}}$  in an individual embryo was defined as the mean intensity of 5 consecutive bins with the peak position in the middle. Embryos that are ~8-16 min into the interphase of nc14 (combination of time classes T3 and T4) were selected for comparisons of cytoplasmic *hb* mRNA levels.  $hb_{\text{plat}}$  was calculated as follows. For a given embryo, 5 consecutive bins located  $0.1 x/L$  (fractional embryo length) anterior to its *hb* expression boundary position ( $x_{hb}$ ) were grouped together and the mean intensity value of this group was defined as  $hb_{\text{plat}}$ . Thus,  $hb_{\text{plat}}$  is devoid of both PS4 and the variable anterior stripe (Tautz et al., 1987; Margolis et al., 1995). We defined  $x_{hb}$  as the position where *hb* intensity is at half maximal. Embryo selection and boundary calculation for *eve* experiments were carried out as described previously (Liu and Ma, 2011; Liu and Ma, 2013a).

Quantitative FISH to detect nascent *hb* transcripts as intron dots in embryos was performed as follows. Digoxigenin (Roche)-labeled antisense RNA probes targeting the *hb* intron was prepared and FISH was performed (He et al., 2011). Wheat Germ Agglutinin (WGA) with Alexa Fluor® 555 conjugate was used to stain the nuclear membrane to mark the nuclear boundary. To maximize the number of intron dots detected, we imaged embryos that had been flattened (He et al., 2011); a separate, midsagittal image for each embryo was also captured for measuring nuclear heights to allow the temporal ranking of embryos and grouping them into time classes. We generally took 8-10  $z$ -sections (covering 4-5 $\mu\text{m}$  along the  $z$  axis), to capture all the *hb* intron dots in each nucleus (He et al., 2011). Threshold settings for *hb* intron dot detection were as follows (Porcher et al., 2010; Liu and Ma, 2013b; Liu and Ma, 2013a). The pixel number threshold was set to be  $\geq 3$  and the intensity threshold for an individual embryo was set to be the lower limit at which no nuclei in the broad anterior *hb* expression domain had more

than two intron dots. Similar to the definition of  $hb_{\text{plat}}$ , 5 consecutive bins located  $0.1 x/L$  anterior to the  $hb$  expression boundary were grouped together as the plateau region. The mean  $\rho$  value from this region (denoted as  $\rho_{\text{plat}}$ ) and the average intensity per intron dot within this group were calculated for individual embryos. The quantitative FISH experiments to detect the nascent  $lacZ$  transcripts with a RNA probe targeting full length of  $lacZ$  gene were carried out in the same way as described above. The images with  $lacZ$  nascent transcripts captured were analyzed in the same way as for  $hb$ . The  $\rho_{lacZ}$  was defined as the mean  $\rho$  value from 5 consecutive bins with the peak position in the middle.

Quantitative immunostaining for Bcd (anti-Bcd antibodies; Santa Cruz Biotechnology) in embryos, imaging, intensity measurements, and calculation of the length constant ( $\lambda$ ) values were described previously (Liu and Ma, 2011). Specifically, the  $\lambda$  value for an individual embryo is obtained by fitting its Bcd intensity profile with the equation:  $B = A * e^{-x/\lambda} + C$ . The embryos used in the analysis were ~8-16 min into the interphase of nc14 based on the nuclear height.

### **Hatching rate measurement and cuticle pattern examination**

Hatching rate was measured as follows. Freshly eclosed flies were transferred to a fresh vial and maintained at the specified temperature for two days and then allowed to lay eggs on a grape agar plate. After removing the flies, the number of embryos on the plate was counted and the plate was further incubated at the specified temperature. The larvae that emerged on the plate were counted and removed every day until no new emergence appeared. Hatching rate was calculated by dividing the total number of larvae by the number of embryos on the plate. To

examine the cuticle pattern, embryos were collected on the grape agar plate overnight and allowed to age for 24-36 hrs at 29°C. Cuticles were then prepared according to the Hoyer's method (Ashburner, 1989) and images were captured by dark-field (whole body) and Nomarski (head) microscopy.

### **Statistical analysis**

All experimental values were shown in mean values with standard deviations, with  $n$  standing for the number of independent samples. All image processing and statistical analyses, including Student's  $t$ -test (two-tailed) and curve fitting were performed using the Matlab software (MathWorks).

## **Acknowledgements**

We thank members of our groups at CCHMC, in particular, David Cheung, Feng He, Chuanxuan Wei and Honggang Wu for discussions and assistance. This work was supported in part by 1R01GM101373 from NIH and IOS-0843424 from NSF (to JM).

## **Author Contributions**

JL and JM conceived and designed the study; JL performed all experiments, data acquisition and data analysis; JL and JM interpret the results; JL generated all figures; JL and JM wrote and approved the paper.



## References

- Ashburner, M. (1989). *Drosophila: A laboratory Manual*, Cold Spring Harbor, NY: Cold Spring Harbor Laboratory Press.
- Bischof, J., Maeda, R. K., Hediger, M., Karch, F. and Basler, K. (2007). An optimized transgenesis system for *Drosophila* using germ-line-specific phiC31 integrases, *Proc Natl Acad Sci U S A* **104**: 3312-7.
- Blythe, S. A. and Wieschaus, E. F. (2015). Zygotic genome activation triggers the DNA replication checkpoint at the midblastula transition, *Cell* **160**: 1169-81.
- Bothma, J. P., Magliocco, J. and Levine, M. (2011). The snail repressor inhibits release, not elongation, of paused Pol II in the *Drosophila* embryo, *Curr Biol* **21**: 1571-7.
- Burz, D. S., Pivera-Pomar, R., Jackle, H. and Hanes, S. D. (1998). Cooperative DNA-binding by Bicoid provides a mechanism for threshold-dependent gene activation in the *Drosophila* embryo, *EMBO J* **17**: 5998-6009.
- Bushati, N., Stark, A., Brennecke, J. and Cohen, S. M. (2008). Temporal reciprocity of miRNAs and their targets during the maternal-to-zygotic transition in *Drosophila*, *Curr Biol* **18**: 501-6.
- Chen, K., Johnston, J., Shao, W., Meier, S., Staber, C. and Zeitlinger, J. (2013). A global change in RNA polymerase II pausing during the *Drosophila* midblastula transition, *Elife* **2**: e00861.
- Cheung, D., Miles, C., Kreitman, M. and Ma, J. (2014). Adaptation of the length scale and amplitude of the Bicoid gradient profile to achieve robust patterning in abnormally large *Drosophila melanogaster* embryos, *Development* **141**: 124-35.
- De Renzis, S., Elemento, O., Tavazoie, S. and Wieschaus, E. F. (2007). Unmasking activation of the zygotic genome using chromosomal deletions in the *Drosophila* embryo, *PLoS Biol* **5**: e117.
- Di Talia, S., She, R., Blythe, S. A., Lu, X., Zhang, Q. F. and Wieschaus, E. F. (2013). Posttranslational control of Cdc25 degradation terminates *Drosophila*'s early cell-cycle program, *Curr Biol* **23**: 127-32.
- Edgar, B. A., Kiehle, C. P. and Schubiger, G. (1986). Cell cycle control by the nucleocytoplasmic ratio in early *Drosophila* development, *Cell* **44**: 365-72.
- Erickson, J. W. and Quintero, J. J. (2007). Indirect effects of ploidy suggest X chromosome dose, not the X:A ratio, signals sex in *Drosophila*, *PLoS Biol* **5**: e332.
- Foe, V. E. and Alberts, B. M. (1983). Studies of nuclear and cytoplasmic behaviour during the five mitotic cycles that precede gastrulation in *Drosophila* embryogenesis, *J Cell Sci* **61**: 31-70.
- Fung, J. C., Marshall, W. F., Dernburg, A., Agard, D. A. and Sedat, J. W. (1998). Homologous chromosome pairing in *Drosophila melanogaster* proceeds through multiple independent initiations, *J Cell Biol* **141**: 5-20.
- Gans, M., Audit, C. and Masson, M. (1975). Isolation and characterization of sex-linked female-sterile mutants in *Drosophila melanogaster*, *Genetics* **81**: 683-704.
- Garcia, H. G., Tikhonov, M., Lin, A. and Gregor, T. (2013). Quantitative imaging of transcription in living *Drosophila* embryos links polymerase activity to patterning, *Curr Biol* **23**: 2140-5.
- Gareau, J. R. and Lima, C. D. (2010). The SUMO pathway: emerging mechanisms that shape specificity, conjugation and recognition, *Nat Rev Mol Cell Biol* **11**: 861-71.

- Gebelein, B. and Ma, J.** (2015). Regulation in the early *Drosophila* embryo, *Reviews in Cell Biology and Molecular Medicine* (to appear).
- Geiss-Friedlander, R. and Melchior, F.** (2007). Concepts in sumoylation: a decade on, *Nat Rev Mol Cell Biol* **8**: 947-56.
- Grimm, O. and Wieschaus, E.** (2010). The Bicoid gradient is shaped independently of nuclei, *Development* **137**: 2857-62.
- Guilgur, L. G., Prudencio, P., Sobral, D., Liszekova, D., Rosa, A. and Martinho, R. G.** (2014). Requirement for highly efficient pre-mRNA splicing during *Drosophila* early embryonic development, *Elife* **3**: e02181.
- He, F., Ren, J., Wang, W. and Ma, J.** (2011). A multiscale investigation of bicoid-dependent transcriptional events in *Drosophila* embryos, *PLoS One* **6**: e19122.
- He, F., Ren, J., Wang, W. and Ma, J.** (2012). Evaluating the *Drosophila* Bicoid morphogen gradient system through dissecting the noise in transcriptional bursts, *Bioinformatics* **28**: 970-5.
- He, F., Wei, C., Wu, H., Cheung, D., Jiao, R. and Ma, J.** (2015). Fundamental origins and limits for scaling a maternal morphogen gradient, *Nat Commun* **6**: 6679.
- He, F., Wen, Y., Deng, J., Lin, X., Lu, L. J., Jiao, R. and Ma, J.** (2008). Probing intrinsic properties of a robust morphogen gradient in *Drosophila*, *Dev Cell* **15**: 558-67.
- Jaeger, J., Manu and Reinitz, J.** (2012). *Drosophila* blastoderm patterning, *Curr Opin Genet Dev* **22**: 533-41.
- Jaeger, J., Surkova, S., Blagov, M., Janssens, H., Kosman, D., Kozlov, K. N., Manu, Myasnikova, E., Vanario-Alonso, C. E., Samsonova, M. et al.** (2004). Dynamic control of positional information in the early *Drosophila* embryo, *Nature* **430**: 368-71.
- Lagha, M., Bothma, J. P., Esposito, E., Ng, S., Stefanik, L., Tsui, C., Johnston, J., Chen, K., Gilmour, D. S., Zeitlinger, J. et al.** (2013). Paused Pol II coordinates tissue morphogenesis in the *Drosophila* embryo, *Cell* **153**: 976-87.
- Langley, A. R., Smith, J. C., Stemple, D. L. and Harvey, S. A.** (2014). New insights into the maternal to zygotic transition, *Development* **141**: 3834-41.
- Lee, M. T., Bonneau, A. R. and Giraldez, A. J.** (2014). Zygotic genome activation during the maternal-to-zygotic transition, *Annu Rev Cell Dev Biol* **30**: 581-613.
- Lehmann, R. and Nusslein-Volhard, C.** (1987). hunchback, a gene required for segmentation of an anterior and posterior region of the *Drosophila* embryo, *Dev Biol* **119**: 402-17.
- Liang, H. L., Nien, C. Y., Liu, H. Y., Metzstein, M. M., Kirov, N. and Rushlow, C.** (2008). The zinc-finger protein Zelda is a key activator of the early zygotic genome in *Drosophila*, *Nature* **456**: 400-3.
- Little, S. C., Tikhonov, M. and Gregor, T.** (2013). Precise developmental gene expression arises from globally stochastic transcriptional activity, *Cell* **154**: 789-800.
- Liu, J., He, F. and Ma, J.** (2011). Morphogen gradient formation and action: insights from studying Bicoid protein degradation, *Fly (Austin)* **5**: 242-246
- Liu, J. and Ma, J.** (2011). Fates-shifted is an F-box protein that targets Bicoid for degradation and regulates developmental fate determination in *Drosophila* embryos, *Nat Cell Biol* **13**: 22-9.
- Liu, J. and Ma, J.** (2012). *Drosophila* Bicoid is a substrate of sumoylation and its activator function is subject to inhibition by this post-translational modification, *FEBS Lett* **586**: 1719-23.
- Liu, J. and Ma, J.** (2013a). Dampened regulates the activating potency of Bicoid and the embryonic patterning outcome in *Drosophila*, *Nat Commun* **4**: 2968.
- Liu, J. and Ma, J.** (2013b). Uncovering a dynamic feature of the transcriptional regulatory network for anterior-posterior patterning in the *Drosophila* embryo, *PLoS One* **8**: e62641.

- Lott, S. E., Villalta, J. E., Schroth, G. P., Luo, S., Tonkin, L. A. and Eisen, M. B.** (2011). Noncanonical compensation of zygotic X transcription in early *Drosophila melanogaster* development revealed through single-embryo RNA-seq, *PLoS Biol* **9**: e1000590.
- Lu, X., Li, J. M., Elemento, O., Tavazoie, S. and Wieschaus, E. F.** (2009). Coupling of zygotic transcription to mitotic control at the *Drosophila* mid-blastula transition, *Development* **136**: 2101-10.
- Lucas, T., Ferraro, T., Roelens, B., De Las Heras Chanes, J., Walczak, A. M., Coppey, M. and Dostatni, N.** (2013). Live imaging of bicoid-dependent transcription in *Drosophila* embryos, *Curr Biol* **23**: 2135-9.
- Ma, X., Yuan, D., Diepold, K., Scarborough, T. and Ma, J.** (1996). The *Drosophila* morphogenetic protein Bicoid binds DNA cooperatively, *Development* **122**: 1195-206.
- Manu, Surkova, S., Spirov, A. V., Gursky, V. V., Janssens, H., Kim, A. R., Radulescu, O., Vanario-Alonso, C. E., Sharp, D. H., Samsonova, M. et al.** (2009). Canalization of gene expression in the *Drosophila* blastoderm by gap gene cross regulation, *PLoS Biol* **7**: e1000049.
- Margolis, J. S., Borowsky, M. L., Steingrimsson, E., Shim, C. W., Lengyel, J. A. and Posakony, J. W.** (1995). Posterior stripe expression of hunchback is driven from two promoters by a common enhancer element, *Development* **121**: 3067-77.
- Miles, W. O., Jaffray, E., Campbell, S. G., Takeda, S., Bayston, L. J., Basu, S. P., Li, M., Raftery, L. A., Ashe, M. P., Hay, R. T. et al.** (2008). Medea SUMOylation restricts the signaling range of the Dpp morphogen in the *Drosophila* embryo, *Genes Dev* **22**: 2578-90.
- Monsma, S. A., Ard, R., Lis, J. T. and Wolfner, M. F.** (1988). Localized heat-shock induction in *Drosophila melanogaster*, *J Exp Zool* **247**: 279-84.
- Nie, M., Xie, Y., Loo, J. A. and Courey, A. J.** (2009). Genetic and proteomic evidence for roles of *Drosophila* SUMO in cell cycle control, Ras signaling, and early pattern formation, *PLoS One* **4**: e5905.
- Payankulam, S. and Arnosti, D. N.** (2008). Gene regulation: boundaries within limits, *Curr Biol* **18**: R653-R655.
- Perry, M. W., Bothma, J. P., Luu, R. D. and Levine, M.** (2012). Precision of hunchback expression in the *Drosophila* embryo, *Curr Biol* **22**: 2247-52.
- Phillips, J. P. and Pitt, A.** (1985). The RNA polymerases of *Drosophila melanogaster* during early development, *Biochem Genet* **23**: 655-76.
- Porcher, A., Abu-Arish, A., Huart, S., Roelens, B., Fradin, C. and Dostatni, N.** (2010). The time to measure positional information: maternal hunchback is required for the synchrony of the Bicoid transcriptional response at the onset of zygotic transcription, *Development* **137**: 2795-804.
- Pritchard, D. K. and Schubiger, G.** (1996). Activation of transcription in *Drosophila* embryos is a gradual process mediated by the nucleocytoplasmic ratio, *Genes Dev* **10**: 1131-42.
- Rose, L. S. and Wieschaus, E.** (1992). The *Drosophila* cellularization gene *nullo* produces a blastoderm-specific transcript whose levels respond to the nucleocytoplasmic ratio, *Genes Dev* **6**: 1255-68.
- Rosonina, E., Duncan, S. M. and Manley, J. L.** (2010). SUMO functions in constitutive transcription and during activation of inducible genes in yeast, *Genes Dev* **24**: 1242-52.
- Salz, H. K. and Erickson, J. W.** (2010). Sex determination in *Drosophila*: The view from the top, *Fly (Austin)* **4**: 60-70.
- Shermoen, A. W., McClelland, M. L. and O'Farrell, P. H.** (2010). Developmental control of late replication and S phase length, *Curr Biol* **20**: 2067-77.

- Shermoen, A. W. and O'Farrell, P. H.** (1991). Progression of the cell cycle through mitosis leads to abortion of nascent transcripts, *Cell* **67**: 303-10.
- Sung, H. W., Spangenberg, S., Vogt, N. and Grosshans, J.** (2013). Number of nuclear divisions in the Drosophila blastoderm controlled by onset of zygotic transcription, *Curr Biol* **23**: 133-8.
- Surkova, S., Kosman, D., Kozlov, K., Manu, Myasnikova, E., Samsonova, A. A., Spirov, A., Vanario-Alonso, C. E., Samsonova, M. and Reinitz, J.** (2008). Characterization of the Drosophila segment determination morphome, *Dev Biol* **313**: 844-62.
- Tadros, W. and Lipshitz, H. D.** (2009). The maternal-to-zygotic transition: a play in two acts, *Development* **136**: 3033-42.
- Tautz, D., Lehmann, R., Schnurch, H., Schuh, R., Seifert, E., Kienlin, A., Jones, K. and Jackle, H.** (1987). Finger Protein of Novel Structure Encoded by Hunchback, a 2nd Member of the Gap Class of Drosophila Segmentation Genes, *Nature* **327**: 383-389.
- ten Bosch, J. R., Benavides, J. A. and Cline, T. W.** (2006). The TAGteam DNA motif controls the timing of Drosophila pre-blastoderm transcription, *Development* **133**: 1967-77.
- Venken, K. J., He, Y., Hoskins, R. A. and Bellen, H. J.** (2006). P[acman]: a BAC transgenic platform for targeted insertion of large DNA fragments in *D. melanogaster*, *Science* **314**: 1747-51.
- Yu, D. and Small, S.** (2008). Precise registration of gene expression boundaries by a repressive morphogen in Drosophila, *Curr Biol* **18**: 868-76.
- Zalokar, M., Audit, C. and Erk, I.** (1975). Developmental defects of female-sterile mutants of *Drosophila melanogaster*, *Dev Biol* **47**: 419-32.
- Zhao, C., York, A., Yang, F., Forsthoefel, D. J., Dave, V., Fu, D., Zhang, D., Corado, M. S., Small, S., Seeger, M. A. et al.** (2002). The activity of the Drosophila morphogenetic protein Bicoid is inhibited by a domain located outside its homeodomain, *Development* **129**: 1669-80.

## Figures

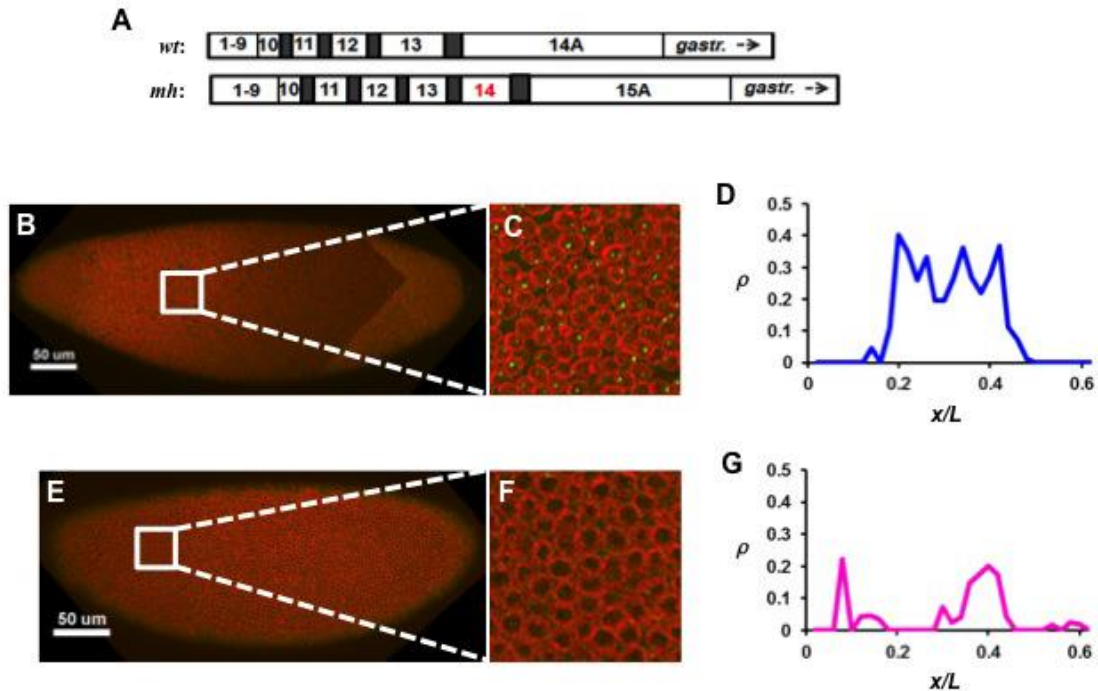

**Fig. 1. *hb* transcription is shut down at nuclear cycle (nc) 15 in the *mh* embryo.** (A) Schematic diagram showing an extra cleavage cycle (14) in *mh* embryos (Edgar et al., 1986; Rose and Wieschaus, 1992; Lu et al., 2009). (B-C) An image captured from an embryo at the early nc15 with the intron dots stained in green and nuclear envelope in red. Panel C is a magnified view of the image. (D) The  $\rho$  profile quantified from the image B. Anterior part of the embryo is shown. (E-G) Shown are the images and the  $\rho$  profile from an *mh* embryo at late nc15. A peak of the  $\rho$  profile in this embryo is likely reflective of Bcd-independent transcription at the PS4 position (see also Fig. 7 for further discussions). Gastrulation is marked as “gastr.”.

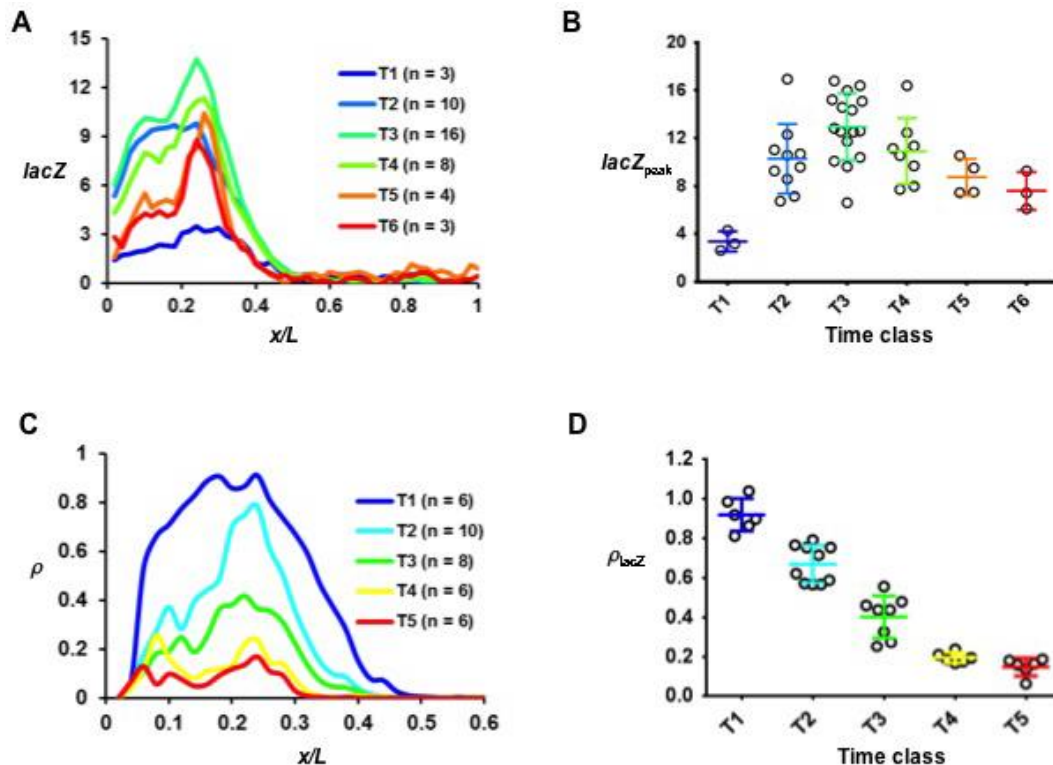

**Fig. 2. Transcription dynamics of the *bcd6-lacZ* reporter gene.** (A) Shown is the mean *lacZ* FISH intensity profile (in arbitrary units, a.u.) at the indicated time classes. (B) Shown is the *lacZ*<sub>peak</sub> value in individual embryos that were grouped into time classes. The mean and standard deviation (s.d.) for each time class are also shown. They are  $3.37 \pm 0.85$ ,  $10.29 \pm 2.91$ ,  $12.96 \pm 2.81$ ,  $10.92 \pm 2.75$ ,  $8.75 \pm 1.54$  and  $7.60 \pm 1.59$  for T1 to T6, respectively. Here each circle represents an individual embryo. The *lacZ*<sub>peak</sub> value at the first two time classes was derived from the plateau region due to a lack of an apparent peak. (C,D) Shown are the mean  $\rho$  profile and  $\rho_{lacZ}$  at the indicated time classes. Similar to *lacZ*<sub>peak</sub>, the  $\rho_{lacZ}$  value at T1 was derived from the plateau region. The mean  $\rho_{lacZ}$  values are  $0.92 \pm 0.08$ ,  $0.67 \pm 0.09$ ,  $0.40 \pm 0.11$ ,  $0.19 \pm 0.03$  and  $0.15 \pm 0.04$  for T1 to T5, respectively. Time classes are  $\sim 4$  min intervals into nc14.

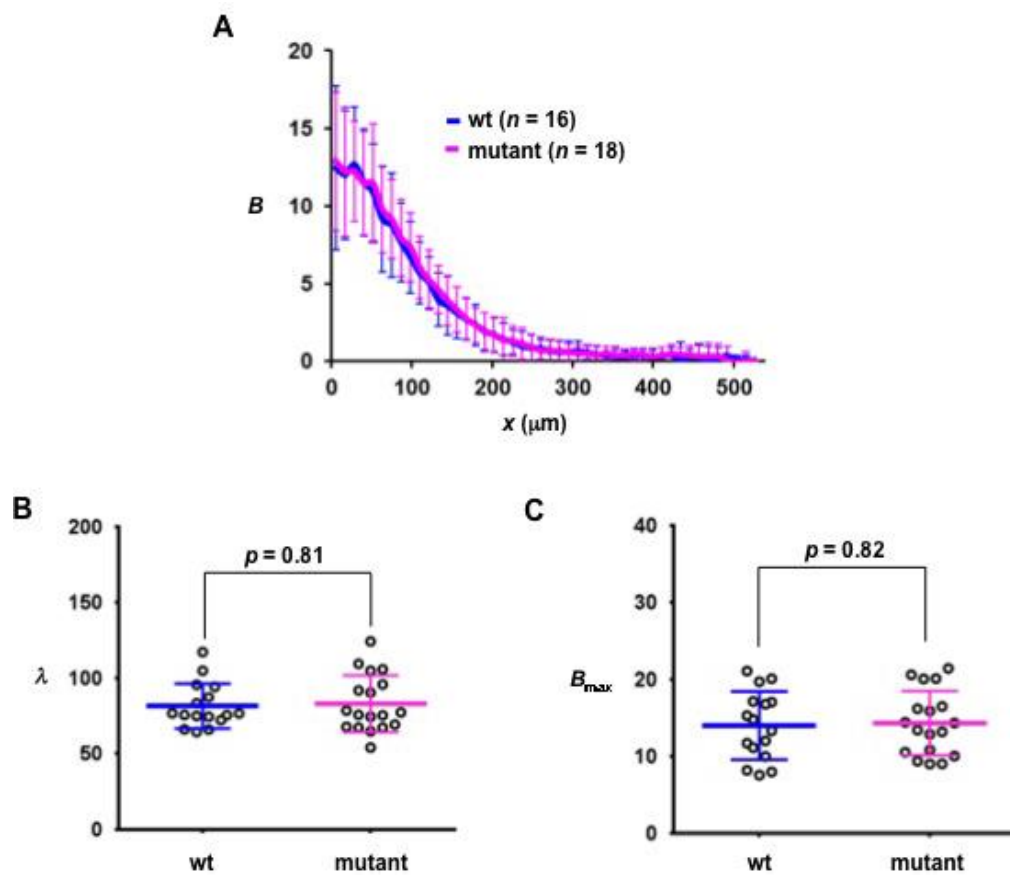

**Fig. 3. The wt and mutant embryos have similar Bcd gradient profiles.** (A) Shown is the mean profile of Bcd intensities (in a.u.) from the wt and mutant embryos. (B,C) Shown are measured  $\lambda$  ( $\mu\text{m}$ ) and  $B_{\text{max}}$  (a.u.) from individual wt and mutant embryos, with mean and s.d. shown. The  $p$  value is calculated from Student's  $t$  test.

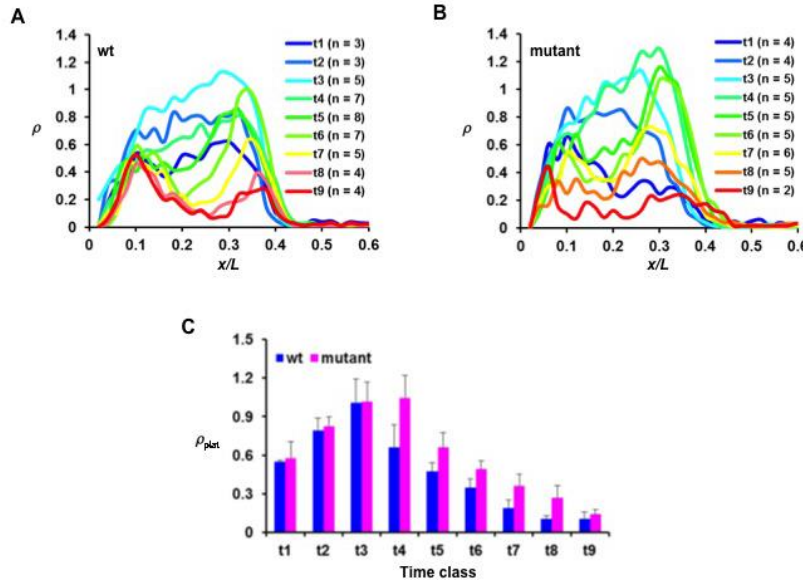

**Fig. 4. *hb* shutdown is delayed in the mutant embryo.** (A,B) Shown are the mean  $\rho$  profiles at the indicated time classes from wt and mutant embryos. (C) Comparison of the mean  $\rho_{\text{plat}}$  values at the indicated time classes between wt and mutant embryos, with s.d. shown. Time classes are  $\sim 1$  min intervals into nc14. The mean  $\rho_{\text{plat}}$  and s.d. are  $0.55 \pm 0.01$ ,  $0.79 \pm 0.10$ ,  $1.01 \pm 0.18$ ,  $0.66 \pm 0.17$ ,  $0.47 \pm 0.07$ ,  $0.35 \pm 0.07$ ,  $0.19 \pm 0.07$ ,  $0.10 \pm 0.03$  and  $0.11 \pm 0.05$  for t1 to t9 of wt embryos, respectively,  $0.58 \pm 0.13$ ,  $0.83 \pm 0.07$ ,  $1.02 \pm 0.15$ ,  $1.05 \pm 0.17$ ,  $0.66 \pm 0.12$ ,  $0.49 \pm 0.07$ ,  $0.36 \pm 0.09$ ,  $0.27 \pm 0.10$  and  $0.14 \pm 0.04$  for t1 to t9 of mutant embryos, respectively. The  $p$  values between wt and mutant embryos are 0.73, 0.63, 0.94,  $3.4 \times 10^{-3}$ ,  $3.9 \times 10^{-3}$ ,  $4.2 \times 10^{-3}$ ,  $5.7 \times 10^{-3}$ ,  $1.4 \times 10^{-2}$  and 0.46 for t1 to t9, respectively. Note the difference between the time scales in this figure ( $\sim 1$  min) and Fig. 2 ( $\sim 4$  min). In addition, while the active copies of the endogenous *hb* gene shown in this figure were detected by an intronic probe, those of the intronless *lacZ* reporter transgene were detected by a coding sequence probe. As discussed recently (Liu and Ma, 2013a), unlike intronic probes, the use of coding sequence probes can cause the detected active sites to "linger" for a period of time after transcription initiation/elongation near the promoter has been shut off.



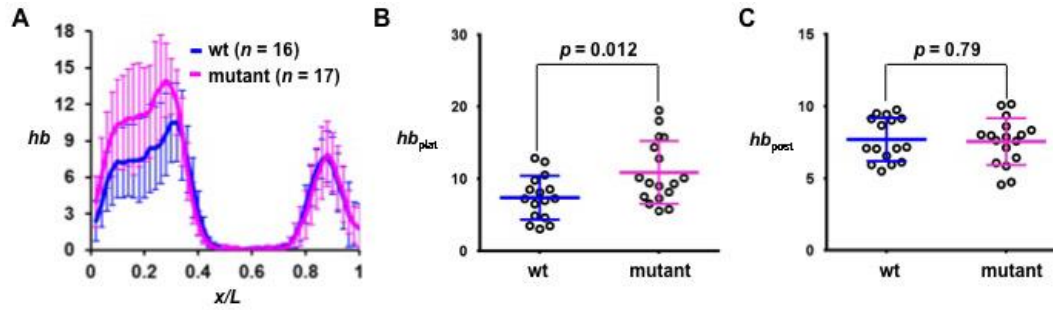

**Fig. 5. *hb* mRNA level is increased in mutant embryos.** (A) Shown are the mean profiles of *hb* intensities (in a.u.) from wt and mutant embryos. (B,C) Shown are measured  $hb_{\text{plat}}$  and  $hb_{\text{post}}$  values in individual wt or mutant embryos. The mean  $hb_{\text{plat}}$  are shown in text and the mean  $hb_{\text{post}}$  are  $7.71 \pm 1.50$  and  $7.59 \pm 2.45$  in wt and mutant embryos, respectively. The  $p$  values in the figure shows a significant difference in  $hb_{\text{plat}}$  but not in  $hb_{\text{post}}$ .

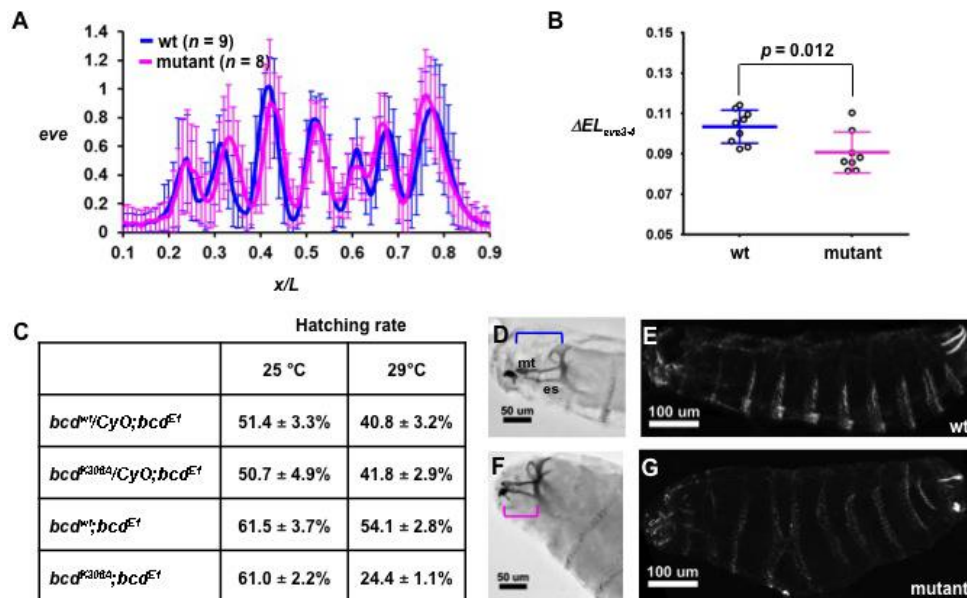

**Fig. 6. Developmental defects exhibited by mutant embryos.** (A) Shown is the normalized *eve* intensity profile from wt and mutant embryos. (B) Shown is the  $\Delta EL_{eve3-4}$  value in individual embryos from wt and mutant embryos. (C) Shown is the hatching rate result under the conditions given. (D,E) Shown is the cuticle pattern of an embryo from the *bcd<sup>wt</sup>,bcd<sup>E1</sup>* mother at 29°C. Panel D shows the head structure from Nomarski microscopy, while panel E shows the denticle pattern of the whole body under dark-field microscopy. (F,G) The cuticle patterns from the *bcd<sup>K308A</sup>,bcd<sup>E1</sup>* mother at 29 °C. Note a shortening in mediate tooth (mt) and epistomal sclerite (es) and a denticle fusion in this embryo. In panels D and F, the spans from mt to the end of es are marked by brackets.

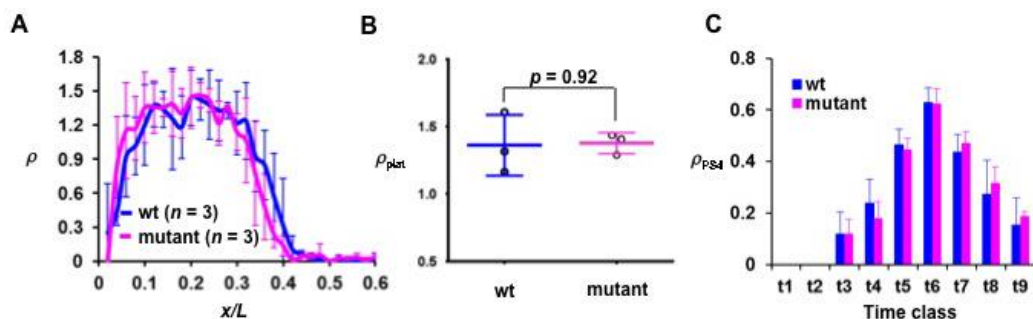

**Fig. 7. The regulation of shutdown of *hb* transcription is stage- and input-dependent. (A)**

Shown is the mean  $\rho$  profile at nc13 from wt and mutant embryos. **(B)** Shown is the  $\rho_{\text{plat}}$  value

from individual wt and mutant embryos at nc13. **(C)** The mean  $\rho_{\text{PS4}}$  value at different t time

classes of nc14 was compared between wt and mutant embryos. PS4-specific transcription is not

detectable at t1 and t2. The mean  $\rho_{\text{PS4}}$  are  $0.12 \pm 0.08$ ,  $0.24 \pm 0.09$ ,  $0.46 \pm 0.06$ ,  $0.63 \pm 0.06$ ,

$0.44 \pm 0.07$ ,  $0.27 \pm 0.13$  and  $0.15 \pm 0.11$  for t3 to t9 of wt embryos, respectively;  $0.12 \pm 0.06$ ,

$0.18 \pm 0.07$ ,  $0.44 \pm 0.05$ ,  $0.62 \pm 0.06$ ,  $0.47 \pm 0.05$ ,  $0.32 \pm 0.06$  and  $0.19 \pm 0.02$  for t3 to t9 of

mutant embryos, respectively. The  $p$  values between wt and mutant embryos are 0.95, 0.08, 0.44,

0.88, 0.45, 0.31 and 0.32 for t3 to t9, respectively.
